## 13 **Abstract**

14 There is considerable insight into pathways and genes associated with heat-stress conditions.  
15 Most genes involved in stress response have been identified using mutant screens or gene  
16 knockdowns. Yet, there is limited understanding of the temporal dynamics of global gene  
17 expression in stressful environments. Here, we studied global gene expression profiles during 12  
18 hours of heat stress in the nematode *C. elegans*. Using a high-resolution time series of increasing  
19 stress exposures, we found a distinct shift in gene expression patterns between 3-4 hours into the  
20 stress response, separating an initially highly dynamic phase from a later relatively stagnant  
21 phase. This turning point in expression dynamics coincided with a phenotypic turning point, as  
22 shown by a strong decrease in movement, survival and, progeny count in the days following the  
23 stress. Both detectable at transcriptional and phenotypic level, this study pin-points a relatively  
24 small time frame during heat stress at which enough damage is accumulated, making it  
25 impossible to recover the next few days.

26

## 27 **Introduction**

28 Heat-stress results from an exposure to potentially harmful temperature conditions beyond the  
29 optimum range of an organism. An increase in the intracellular temperature can interfere with  
30 protein homeostasis, leading to an accumulation of misfolded proteins and protein aggregates  
31 [1]. Over the past few decades, detailed insights have been obtained about the molecular and  
32 genetic control of the cellular response to heat-stress. To avoid the detrimental effects of  
33 cytotoxic misfolded protein species and protein aggregates, multiple stress response systems

34 have evolved as a first line of defence to maintain proteostasis, of which the highly-conserved  
35 heat-shock response (HSR) pathway is prominent [1,2].

36 The accumulation of misfolded proteins is also a hallmark of aging and age-related  
37 diseases, such as Alzheimer's and Parkinson's disease [3–5]. The connection between the  
38 processes involved in stress and aging is further substantiated by the fact that several components  
39 of the stress response pathways were found to function as regulators of lifespan [6–8]. For  
40 example, the evolutionary highly conserved transcription factor HSF-1 is a key component in the  
41 initiation of the HSR, as well as a regulator of lifespan [9]. Therefore, understanding how an  
42 organism perceives and handles heat-stress is fundamental for understanding the molecular  
43 mechanisms that underlie aging [4].

44 The nematode *Caenorhabditis elegans* is an established metazoan model for studying the  
45 effect of - and response to – heat stress *in vivo* [4,6,7,9]. One of the most widely studied  
46 responses in *C. elegans* is to acute heat stress, which can be easily applied by exposing the  
47 animal to temperatures between 33-37°C [9–11]. It was shown that *C. elegans* detects and  
48 responds to heat stress via transient receptor potential channels and a neuropeptide signaling  
49 pathway [12], and is capable of swiftly up-regulating a suite of protective proteins (mainly  
50 chaperones) to prevent protein denaturation and misfolding, a process which affects every aspect  
51 of the animals' biology [4]. Short or mild stresses can be tolerated and can even protect  
52 individuals against future stresses [11]. However, *C. elegans* is limited in the number of  
53 chaperones that can be produced, moreover, chaperones, being proteins themselves, are also  
54 likely to denature after sustained heat stress.

55 The effects of heat stress on *C. elegans* are often quantified on a phenotypic level by  
56 recording complex traits such as survival rate, mobility, and reproduction [11,13,14]. Generally,

57 the inflicted damage accumulates with increasing temperature and exposure time. For example,  
58 brood size decreases with moderate increases in temperature beyond the optimum [14,15],  
59 whereas a strong decrease in survival rates is only observed after prolonged exposures to heat  
60 stress [11,16]. At the level of the transcriptome, a heat shock induces a strong response. Genome  
61 wide gene expression analysis in *C. elegans* shows that a two hour exposure to 35°C affects  
62 genes associated with development, reproduction and metabolism [17]. Furthermore, an  
63 exposure of 30 minutes to 33°C already induced a massive global gene expression shift highly  
64 dependent on HSF-1, affecting genes associated with a wide range of functions such as cuticle  
65 structure, development, stress response, and metabolism [18].

66         Yet, there is limited understanding of the temporal dynamics of global gene expression  
67 patterns during heat stress. Given the range of phenotypic effects, it is to be expected that the  
68 transcriptional response during heat stress is highly dynamic. For example, the initial  
69 transcriptional response to heat shock probably does not resemble the transcriptome after a lethal  
70 exposure to heat stress. To gain more insight into the underlying dynamics of the stress response,  
71 we have generated a high-resolution time-series of transcriptomic and phenotypic data of *C.*  
72 *elegans* exposed to heat stress conditions at 35°C for 0-12h. Transcriptomic analysis revealed a  
73 global shift in expression dynamics occurring between 3 and 4 hours into the heat exposure. The  
74 shift marks the end of an initially highly dynamic transcriptional response to heat stress that  
75 plateaus at longer exposures. On a phenotypic level, longer exposures (> 4h) were associated  
76 with much lower chances of recovery in the four days following the stress. Therefore, this  
77 phenotypic turning point follows shortly after the transcriptional turning point, and is marked by  
78 a strong decrease in movement, survival, and progeny count.

79

## 80 **Results**

### 81 **Transcriptional variation during prolonged heat stress**

82 We first assessed the impact of heat stress durations on genome-wide expression levels. Wild  
83 type Bristol N2 populations were exposed to heat stress conditions at 35°C for increased  
84 exposure durations between 0.5-12 hours (**Fig 1A**). To find the main sources of variation during  
85 the transcriptional response to heat-shock, we used principal component analysis (PCA). The  
86 first two principal components (PCs) captured 77% (1<sup>st</sup> 57%, 2<sup>nd</sup> 20%) of the total variation (**Fig**  
87 **1B**). The first PC sorted the time points in chronological order, showing that variation in gene  
88 expression between samples was largely due to the increasing length of heat exposure. Together,  
89 the 1<sup>st</sup> and 2<sup>nd</sup> PCs indicated 3-4 hours of heat exposure as a turning point in transcriptional  
90 patterns during the prolonged stress response.

91

### 92 **Early transcriptional activation of heat shock proteins**

93 Having identified a turning point in transcriptional patterns, we further investigated the temporal  
94 dynamics of expression changes for a set of previously associated heat stress response genes. For  
95 *C. elegans*, the Gene Ontology database listed 72 genes with a role in the ‘response to heat  
96 stress’ (GO:0009408, WormBase version 257). Most of these genes show minor transcriptional  
97 changes in the course of the 12-hour heat exposure (**S1 Fig**). This is not surprising, since many  
98 components of the (heat) stress response are constitutively expressed [19].

99         The fastest transcriptional response was found for five heat shock proteins, which are part  
100 of the heat shock response pathway activated by HSF-1 upon stress exposure. Within 30 minutes  
101 of stress exposure, *hsp-16.1*, *hsp-16.2*, *hsp-16.41*, *hsp-16.48*, and *hsp-70* showed a ~16-fold  
102 increase in expression levels (**Fig S1**). The expression levels of these genes peak 4 hours into the

103 stress exposure, corresponding with the turning point identified in the PCA. Correlation analysis  
104 extracted two more genes from our data set that were not listed in the GO term ‘response to heat  
105 stress’, but presented with similar expression patterns to the above heat-shock proteins: F13E9.1  
106 (ortholog of human NISCH) and F44E5.5 (member of the *hsp-70* family). F44E5.5 was also  
107 detected in previous studies [18,20]. Together, this small set of seven genes presented the  
108 strongest, first and immediate reaction of the transcriptional response to stress.

109

## 110 **Changes in gene expression reach a plateau**

111 We further investigated the temporal dynamics of global transcriptome changes. About ~6200  
112 (~30%) genes contributed significantly (q-value < 0.01) to the variation explained by the first  
113 two principal components. This sub-set was used as input for k-means clustering to extract  
114 common patterns in gene expression changes, identifying six distinct stress-response groups (**Fig**  
115 **2A-B**). Cluster 1, 4, and 6 (representing ~3790 (60%) of the genes) contained genes  
116 downregulated during exposure to heat (**Fig 2A**), and cluster 2, 3, and 5 contained upregulated  
117 genes (~2450 (40%) of genes; **Fig 2B**). The largest changes were found in cluster 1 and 3 with  
118 an average 5-fold down- and 32-fold up-regulation, respectively.

119 Within these clusters, the initial in- or decrease in transcript levels started rapidly,  
120 between 0.5-1 hour after initiation of the heat stress exposure, and reached a plateau before 3  
121 hours into the stress response. One exception is cluster 1, consisting of 420 genes that were  
122 down-regulated after 4 hours. Interestingly, this was the only pattern clearly distinguishing the  
123 later (>4h) time points. As previously indicated by the PCA, the transcriptional patterns reveal a  
124 global change in expression dynamics after approximately 3-4 hours into the stress response,

125 starting with a highly dynamic adaptive phase and ending with a plateau phase of minimal  
126 overall changes.

127 To explore the biological functions associated with the gene sets within the individual  
128 response clusters, an GO-enrichment analysis was performed (**Fig 2C-D; S1 Table**). Overall, the  
129 down-regulated clusters were enriched with structural constituents of the cuticle, particularly  
130 collagens (*col*, *dpy*, *rol*, *sqt*), as well as genes associated with transcription (*nhr*), metabolic  
131 processes, and locomotion (**Fig 2C**). In the upregulated clusters, genes involved in nucleosome  
132 assembly (*his*) were found to be overrepresented, as well as those regulating embryo and larval  
133 development (**Fig 2D**). Cluster 3, the smallest group (54 genes), had an immediate and strong  
134 reaction to the stress. This cluster could not be associated with an enrichment term. Half of the  
135 genes within this cluster have not previously been classified with any GO term yet are very likely  
136 involved in the response to heat stress.

137

## 138 **Gene expression dynamics correlated with phenotypic changes**

139 Through transcriptome analysis, we identified a turning point around 3-4 hours into the stress  
140 response, separating an initially highly dynamic phase from a later mostly stagnant phase. Next,  
141 we tested how these observed transcriptional patterns correlate with the effects of increasing heat  
142 stress durations on the phenotypic recovery of the animals. To measure the effects, we observed  
143 survival, progeny count, and movement in populations that were allowed to recover at 20°C after  
144 different heat stress durations (**Fig 3**). Since it has previously been shown that it can take three  
145 days after the exposure to a transient lethal heat-shock to observe the fatal effects in the survival

146 scores of *C. elegans* [11], we recorded daily phenotypic observations over a four day recovery  
147 period following the stress.

148 The heat exposure durations resulted in three phenotypically distinct groups. First, for  
149 survival, the animals exposed to heat for up to two hours show high survival chances equal to the  
150 control (**Fig 3A**). An intermediary group was formed by animals exposed to heat for 3-4 hours  
151 with about 80% surviving the first day, which steadily declined to ~60% survival by day 4. It is  
152 of note that the exposure duration of this group coincides with the critical time point (3-4h)  
153 identified in the transcriptomic data. In the third group, with heat-exposures over 6 hours,  
154 survival chances were already drastically reduced after the first day (<20%).

155 Analogous to the 3 distinct survivorship groups found for short-, intermediate- and long-  
156 term stress exposures, this division was also present in the fraction of nematodes regaining a  
157 healthy movement during the recovery period, as well as regaining a normal number of progeny  
158 (**Fig 3B and 3C**). The movement in populations exposed to a short heat stress (< 3 hours) did not  
159 differ from that of control populations. While the heat stress initially causes slightly lower  
160 numbers of progeny, the reproduction peaked 2-3 days after the heat stress together with the  
161 control population. For intermediate exposure durations (3-4 hours), 60-70% of animals  
162 displayed a normal movement, yet reproduction was further reduced and delayed in these  
163 populations. For longer heat exposures (>4 hours), the few surviving individuals commonly  
164 presented abnormal, slow, and sporadic movement.

165 Overall, the transcriptional patterns during heat stress changed dramatically around 3-4  
166 hours which coincided with a phenotypic change , as shown by the drastic decrease in  
167 movement, viable offspring, and recovery chances in the days after.

168



## 169 **Heat stress disrupts major developmental processes**

170 To investigate the correlation between gene expression and the different phenotypes, we first  
171 looked at how normal developmental processes progressed under heat stress conditions. Snoek *et*  
172 *al.* have dissected the temporal patterns of global transcript levels of *C. elegans* spanning the  
173 entire 4<sup>th</sup> larval stage [21], which corresponds to the time frame used in this study. We analysed  
174 the heat stress expression patterns in relation to developmental gene expression. First, we  
175 selected gene clusters strongly upregulated during L4 development at 20°C (see Materials and  
176 Methods for details; **Fig 4A**). These genes showed little change in heat stress conditions at 35°C.  
177 Likewise, genes with a strong transcriptional response to heat stress (cluster 3) displayed few  
178 expression differences during development. Next, we selected gene clusters with a strong  
179 decrease in expression levels (**Fig 4B**). While most of the transcriptional patterns differed  
180 between development and heat stress conditions, a relatively small number of genes (*i.e.* 82  
181 genes) were present in both groups. An enrichment analysis of these genes found a strong  
182 overrepresentation associated with the cuticle structure and locomotion.

183 Together, these results showed that heat stress disrupted the major transcriptional changes  
184 normally occurring during L4 development, indicative for the heat stress induced developmental  
185 delay. Furthermore, it shows that the animal almost fully shifts its transcriptional program to deal  
186 with the acute heat stress conditions.

187 To identify the genes involved in the sharp decrease in survival after the turning point in  
188 expression dynamics, we compared gene expression levels of samples taken between 2-4 hours  
189 into the heat-shock with the samples taken at the last three time points (6, 8 and 12 hours). We  
190 found 262 upregulated and 667 downregulated genes (q-value < 0.0001; **S1 Table** and **S2 Fig**).  
191 Enrichment analysis revealed an overrepresentation of genes involved with cuticle development

192 and metabolic processes in the late heat stress down-regulated group. Genes involved in  
193 reproduction, development, and locomotion were enriched in the late heat stress up-regulated  
194 group, possibly showing the continuation of the normal developmental processes after the initial  
195 slow down. However, it should be noted that upregulation occurred with very low effect sizes,  
196 which could indicate a hampering of the transcriptional processes.

197

## 198 **Discussion**

199 By analysing a series of stress exposure times in *C. elegans* we detected a shift in gene  
200 expression patterns between 3-4 hours into the stress response, separating an initially highly  
201 dynamic phase from a later mostly stagnant phase. Survival, progeny count, and movement  
202 revealed that exposure to a heat stress lasting longer than 4 hours resulted in irreversible damage.  
203 Overall, the heat stress response could be divided into three distinct phases: i) an early highly  
204 dynamic phase up to 2 hours of stress exposure (including a very early upregulation of heat  
205 shock proteins), ii) an intermediate phase in which the transcriptional response attenuates  
206 presenting a turning point in dynamics (3-4 hours), iii) a late phase with gradual transcriptomic  
207 changes (6-12 hours). Phenotypically, each phase corresponds with distinct trends in the ability  
208 to recover from the stress, the ability to recover normal movement, and to produce viable  
209 offspring in the four days of recovery following the stress.

210 To our knowledge, this is the first study that links the dynamics of heat stress response at  
211 the transcriptome level to the ability to recover. Gene expression regulation under stress  
212 conditions is strictly controlled, its kinetics are rapid and very often it is reversible. This allows  
213 for extremely rapid adaptation of cells and tissues in response to general stress, in particular heat

214 stress, and for returning to a baseline level [19]. We analysed the phenotypic recovery from these  
215 rapid adaptive changes occurring during stress and found that already a relatively early response  
216 to heat stress abruptly changes development.

217

218

## 219 **Early dynamic response to heat-stress disrupts development**

220 During the early phase of heat stress, the transcriptional response is highly dynamic. About 400  
221 genes (cluster 2 and 5) are highly upregulated. Comparison with transcriptional patterns  
222 normally occurring during development has shown that this gene-set specifically reacts in the  
223 response to stress. Furthermore, genes highly active during development show low  
224 transcriptional changes during stress conditions. These results indicate that the animal almost  
225 fully switches its transcriptional focus on counteracting the adverse effects of heat stress. In this  
226 context, it is not surprising that heat shock proteins are the first set of genes to show a strong and  
227 rapid increase in transcript levels. Shortly after, histones and genes associated with the  
228 nucleosome assembly are highly enriched in upregulated gene clusters. Nucleosome remodelling  
229 has previously been shown to be an important part of the stress response, *e.g.* by allowing access  
230 to transcription sites of stress responsive genes [19,22,23]. In *C. elegans*, depletion of a  
231 nucleosome remodelling complex leads to a higher thermal sensitivity [24]. Packaging of DNA  
232 into nucleosomes could be an additional protective mechanism during the stress response.

233         After short exposures to stress, the animals recovered a healthy movement phenotype and  
234 started reproducing, indicating that the protective mechanisms put in place by the early  
235 transcriptional heat shock response are sufficient in this time frame. However, the disruption of  
236 normal transcriptional development could be one of the causes for the observed delay in

237 reproduction. A study in which a two hour 35°C heat-shock was compared to two hour recovery  
238 of that heat-shock showed that the transcriptional patterns in the recovery population had still not  
239 returned to normal [17]. Also, a delay in reproduction has previously been shown in heat-  
240 shocked pre-gravid adult *C. elegans* exposed to temperatures between 30-32°C [15]. Arresting  
241 reproduction ensured limited damage to reproductive compartments during stress conditions. We  
242 found this delay on a transcriptional level in the early heat stress response, as development and  
243 reproduction related genes did not show their normal up regulation.

244

### 245 **Attenuation of dynamic response**

246 At medium-to-long exposures, the transcriptional stress response attenuates corresponding  
247 phenotypes, *i.e.* a ~40% decrease in survival and an increased occurrence of animals with an  
248 abnormal movement phenotype. The attenuation of the heat shock response has mostly been  
249 studied in several cell lines [24,25]. An integral part is the activation and subsequent suppression  
250 of the HSF-1 transcription factor activity through a negative feedback loop, which is partially  
251 mediated by those chaperones that are transcriptionally induced by HSF-1, such as HSP-70 [26].  
252 The attenuation of the heat shock response is believed to serve a protective function, as cell lines  
253 with defects in the process display lower growth rates and reduced fitness [19,25]. In *C. elegans*,  
254 it was shown that a gain-of-function mutation in a negative regulator of the heat-shock response  
255 (HSB-1) results in severe effects on survival after heat stress [24]. In our data set, transcripts of  
256 chaperones induced by HSF-1 increase immensely within the first 30 minutes of the stress  
257 response (**S1 Fig**). The drastic increase slows down until peak levels are reached at 4 hours into  
258 the stress response, followed by a small decrease and complete attenuation. It is unclear if the  
259 observed global transcriptional slowing down is due to an actively regulated process, such as the

260 HSF-1 feed-back loop, or due to a passive process, such as the accumulation of damage to key  
261 cellular processes. Another explanation might be a developmental cue. During normal  
262 development without stress, the *C. elegans* transcriptome is highly dynamic, marked by a  
263 pronounced shift at 50 hours, which overlaps in time with our point of no return [21]. Passing  
264 this point of attenuation might result in the strong decrease in recovery chances. Although the  
265 progression of survival rates in the four days following the heat exposure implies that the heat  
266 shock does not kill nematodes immediately, the profound damage cannot be repaired.

267         At long exposures, recovery chances are drastically reduced. While most transcript level  
268 have reached a plateau, a distinct exception is the pronounced decrease in expression of a set of  
269 genes highly enriched with collagen related genes. Collagens are key components of the  
270 nematode cuticle, which is critical for protection and locomotion [27]. During development, the  
271 transcription of cuticle collagens is tightly regulated between any of the four molts [27,28].  
272 Comparison with normal development (**S3 Fig**), shows a disruption of these patterns and a  
273 general downregulation of all cuticle genes. More recently, gene expression studies in *C. elegans*  
274 have shown that collagen genes are highly expressed in short heat stress exposure and during  
275 oxidative stress [18,29]. The strongly reduced survival changes after longer exposure might be  
276 caused by the later reduction of transcript levels of these cuticle genes in our experiment.

277         Overall, our study links a strong shift in transcriptional dynamics upon exposure to heat  
278 stress with an inability to recover from the stress response. The inability to recover was reflected  
279 in a decrease in worm activity, progeny count, and survival in the days after. Therefore, we  
280 suggest this critical shift in the dynamics of gene expression marks a point-of-no return  
281 ultimately leading to death.

282

## 283 **Materials and Methods**

### 284 **Nematode Culturing and heat-shock treatment**

285 Hermaphrodites of the *Caenorhabditis elegans* strain Bristol N2 were used for all experiments  
286 and kept under standard culturing conditions at 20°C on Nematode Growth Medium (NGM)  
287 seeded with *Escherichia coli* strain OP50 as food source [30]. For the experiments, starved  
288 populations were placed onto fresh NGM dishes seeded with *E. coli* OP50 by transferring a piece  
289 of agar and subsequently grown at 20°C for 3-4 days until sufficient gravid adults had developed.  
290 Age-synchronized populations were obtained by bleaching according to standard protocols using  
291 a hypochlorite solution [30]. After bleaching, eggs were transferred to fresh 9 cm NGM dishes  
292 and maintained at 20°C.

293

### 294 **Heat-shock treatment**

295 The heat shock treatments were performed in an incubator set to 35°C. N2 populations were  
296 exposed to the heat stress treatment starting 46 hours after age-synchronization during the L4  
297 stage. We selected the L4 stage because nematodes in this stage exhibit a strong response to  
298 heat-stress [11]. The response declines in adult worms [31]. Samples were taken at several time  
299 points during the stress period: 0.5, 1, 2, 3, 4, 6, 8, or 12 hours. In total, 3-5 samples were  
300 collected for each time point. As preparation for the transcriptome analysis, the populations were  
301 washed off the plate with M9 buffer, collected in Eppendorf tubes and flash-frozen in liquid  
302 nitrogen and stored at -80°C until further use. For phenotypic observations, the N2 populations  
303 were transferred back to pre-heat shock maintenance conditions at 20°C.

304

## 305 **Phenotyping**

306 The selected traits (movement, survival, and progeny count) were observed using a  
307 stereomicroscope at approximately 24, 48, 72, and 96 hours post heat-shock. To allow for  
308 accurate scoring of all individual animals, the population size per dish was kept at a maximum of  
309 25 animals at the start of the experiment. In total, 3 dishes per heat-shock duration were scored,  
310 which amounts to a total of approximately 60 animals per treatment. Animals were transferred to  
311 fresh NGM dishes every day during the reproductive phase using a platinum wire. Bagging and  
312 suicidal animals were censored.

313

## 314 **Movement and Survival**

315 Movement was scored based on classification systems that have previously been described in  
316 association with aging studies, where it acts as a measure of the biological age [32,33]. These  
317 systems were combined and adapted to score the impact of the heat-shock. Healthy nematodes  
318 are actively moving in a sinusoidal pattern (Hosono: type I; Herndon: Class A). As a result of the  
319 heat shock, a proportion of the animals deviated from the healthy phenotype in varying degrees  
320 such as visibly lower levels of activity, low responsiveness to touch with a platinum wire and/or  
321 an irregular shape of movement (for example due to a partially paralysed tail). This is  
322 corresponding to Class B and C of Herndon or Type II and III of Hosono). Worms were scored  
323 as dead, when no head movement was observed after 3 touches with a platinum wire.

324

## 325 **Progeny count**

326 It has previously been shown that *C. elegans* can lay non-viable eggs after heat shock [11]. For  
327 this reason, the progeny count was measured, defined as the absolute number of living offspring  
328 per population. We counted the progeny one day after transferring the adults of the experimental  
329 populations to fresh dishes, at which time viable eggs have hatched. For populations with a high  
330 level of reproduction, the total number of live offspring was estimated based on the count of a  
331 quarter of the dish.

332

## 333 **Transcriptome profile**

### 334 **RNA isolation**

335 RNA was isolated from the flash frozen samples using the Maxwell® 16 AS2000 instrument  
336 with a Maxwell® 16 LEV simplyRNA Tissue Kit (both Promega Corporation, Madison, WI,  
337 USA). The mRNA was isolated according to protocol with a modified lysis step. Here, 200 µl  
338 homogenization buffer, 200 µl lysis buffer and 10 µl of a 20 mg/ml stock solution of proteinase  
339 K were added to each sample. The samples were then incubated for 10 minutes at 65°C and 1000  
340 rpm in a Thermomixer (Eppendorf, Hamburg, Germany). After cooling on ice for 1 minute, the  
341 samples were pipetted into the cartridges resuming with the standard protocol.

342

### 343 **Sample preparation and scanning**

344 For cDNA synthesis, labelling and the hybridization reaction, the ‘Two-Color Microarray-Based  
345 Gene Expression Analysis; Low Input Quick Amp Labeling’ - protocol, version 6.0 from Agilent  
346 (Agilent Technologies, Santa Clara, CA, USA) was followed. The *C. elegans* (V2) Gene



347 Expression Microarray 4X44K slides manufactured by Agilent were used. The microarrays were  
348 scanned with an Agilent High Resolution C Scanner using the settings as recommended. Data  
349 was extracted with the Agilent Feature Extraction Software (version 10.5) following the  
350 manufacturers' guidelines.

351

## 352 **Data pre-processing**

353 Data was analysed using the 'R' statistical programming software (version 3.3.2 64-bit). For  
354 normalization, the Limma package was used with the recommended settings for Agilent [34].  
355 Normalization within and between arrays was done with the Loess and Quantile method,  
356 respectively [35]. The obtained normalized intensities were log<sub>2</sub> transformed and outliers were  
357 removed. Batch effects within the data set were calculated with a linear model and removed as  
358 previously described [21]. For further analysis, the expression values of biological replicas were  
359 averaged. To analyse temporal expression dynamics independent from absolute expression  
360 values, the individual intensities measured at each time point for each gene were rescaled to the  
361 average expression in time per gene. The obtained values were log<sub>2</sub> transformed and are further  
362 referred to as the log<sub>2</sub> ratio with the mean.

363

## 364 **Data accessibility**

365 The microarray datasets supporting this article have been deposited in the ArrayExpress database  
366 at EMBL-EBI ([www.ebi.ac.uk/arrayexpress](http://www.ebi.ac.uk/arrayexpress)) under accession number E-MTAB-5753.

367

## 368 **Data analysis**

369 Principal component analysis (PCA) was performed on the log<sub>2</sub> ratio with the mean to explore  
370 the source of underlying variation in gene expression. PCA scores of the first and second  
371 component were used to select genes with a significant contribution to the variation in expression  
372 dynamics. Selection was based on a significance level  $p < 0.01$  in a linear model relating  
373 expression values with PCA scores for the separate components. To explore overall trends in  
374 gene expression dynamics, gene clusters were extracted by k-means with 200 iterations on 10  
375 different starting sets. Six clusters were sufficient to visualise distinct patterns in gene expression  
376 changes.

377 Differently expressed genes between time-points were deducted by a linear model using  
378 the log<sub>2</sub> expression of individual samples (3-5 samples per heat-shock duration). In cases where  
379 multiple time points were compared, they were grouped into one factor, e.g. Group 1 (2, 3, 4  
380 hours) vs Group 2 (6, 8, 12 hours). A high significance level of  $q < 0.0001$  was chosen.

381 To extract genes with similar expression patterns to heat-shock proteins, we used  
382 spearman correlation analysis on the log<sub>2</sub> ratio with the mean averaged for hsp-16.1, hsp-16.2,  
383 and hsp-16.41. Genes were selected with a log<sub>2</sub> change  $>2$  within the first 30 minutes of heat  
384 exposure.

385

## 386 **Enrichment analysis**

387 To explore the biological functions associated with selected gene sets, we used the functional  
388 annotation tool provided by DAVID 6.8 [36,37]. For the enrichment analysis (functional  
389 annotation chart), settings were limited to Gene Ontology terms (GOTERM\_BP\_DIRECT,  
390 GOTERM\_MF\_DIRECT, GOTERM\_CC\_DIRECT).

391

## 392 **Developmental Data**

393 List of genes within developmental cluster 1 and 5 (strongly up- and downregulated,  
394 respectively) were obtained from Snoek *et al.* [21]. The normalized developmental expression  
395 data set was retrieved from WormQTL [38,39]. From the developmental time series, a subset of  
396 samples were selected that correspond to the heat shock time series (i.e.: of the developmental  
397 time series 46h, 47h, 48h, 49h, 50h, 52h, 54h, and 58h corresponding with the time points in the  
398 heat shock time series 0h, 1h, 2h, 3h, 4h, 6h, 8h, and 12h, respectively). Expression data of  
399 replicates was averaged. To compare expression dynamics between the time series obtained  
400 during development and in heat stress conditions, we selected the expression data of subsets of  
401 genes with strong expression patterns during development (cluster 1 and 5, Snoek *et al.*, 2014)  
402 and heat stress (cluster 1 and 3, **Fig 2, S1 Table**). Heatmaps (R; package: gplots) of the log<sub>2</sub>  
403 ratio with the mean are used to visualize the comparison of the expression dynamics during  
404 development and in heat stress conditions for each subset of genes.

## 405 **Figures**

406 **Fig 1. Experimental set-up and principal component analysis. (A)** mRNA sampling schedule.  
407 Bristol N2 populations were grown at 20°C for 46 hours before the start of the heat-shock at  
408 35°C. Clock-symbols indicate the time of sampling for subsequent transcriptome analysis of the  
409 dynamic stress response. Each time point (0, 0.5, 1, 2, 3, 4, 6, 8, and 12 hours) was sampled 3-5  
410 times. **(B)** Principal component analysis of gene expression data averaged per time point. The  
411 first two components retain 77% of the variation in the data set, and placed the exposure duration  
412 (as indicated by the clock symbol) in chronological order.

413 **Fig 2. Temporal dynamics and functional enrichments of gene expression in response to**  
414 **continuous heat stress at 35°C.** Genes with similar patterns in expression (log<sub>2</sub> ratio with the  
415 mean) were grouped by k-means clustering. Dark coloured bold lines present the average  
416 expression of the individual clusters; lighter corresponding colours present the expression of  
417 individual genes. Enrichment analysis of gene clusters was performed with DAVID 6.8. **(A)**  
418 Cluster 1, 4, and 6 showed a downward trend in gene expression during heat stress. **(B)** Cluster  
419 2, 3, and 5 were upregulated in response to heat stress. **(C)** Enrichment of downregulated gene  
420 clusters. **(D)** Enrichment of upregulated gene clusters 2 and 5. Analysis of cluster 3 did not result  
421 in a significant enrichment.

422 **Fig 3. Effect of increasing heat-shock durations on selected phenotypes.** After exposing N2  
423 populations in the L4 stage to increasing heat-shock durations at 35°C, populations were  
424 maintained at 20°C. A total of ~65 individuals divided over 3 biological replicas per treatment  
425 group were observed. The following phenotypes were scored on the four consecutive days  
426 following the heat-shock: **(A)** fraction alive, **(B)** fraction of worms with a healthy movement  
427 phenotype (i.e. sinusoidal, constant and unprovoked movement), **(C)** the average number of  
428 viable offspring produced per population with a cut-off point set at 1000 offspring.

429 **Fig 4. Comparison of expression dynamics during development (20°C; upper panel) and**  
430 **heat stress (35°C; lower panel) based on gene clusters with strong transcriptional patterns.**  
431 The log<sub>2</sub> transformed gene expression is indicated by the colour scale. Developmental gene  
432 expression data obtained from [21]. Time was measured beginning 46 hours post age-  
433 synchronization. The order of genes within each heat map was retrieved through hierarchical  
434 clustering, and is therefore not the same between the upper and lower panels. **(A)** Gene clusters  
435 with a strong up-regulation during development (left panel; cluster 1 in [21]) or during heat

436 stress (right panel; cluster 3). **(B)** Gene clusters with a strong down-regulation during  
437 development (left panel; cluster 5 in [21]) or during heat stress (right panel; cluster 1). Venn  
438 diagrams presents the number of genes within each group.

439

440

## 441 **Supporting information**

442 **S1 Fig.** Temporal expression patterns of heat stress responsive genes during 12 hours of heat  
443 stress (35°C). Genes were selected based on the information provided by the Gene Ontology  
444 database for the GO term ‘response to heat stress’ (GO:0009408, WormBase version 257).  
445 Expression levels of individual genes are presented as the Log2 ratio with the mean.

446 **S2 Fig.** Volcano plot showing the difference per gene in log2 transformed gene expression levels  
447 between medium exposure durations (2, 3, and 4 hours) and long exposure durations (6, 8, and  
448 12 hours). P-values were inferred from a linear model comparing the two groups, and corrected  
449 for multiple testing by the Benjamini-Hochberg method. The red line indicates the selected  
450 significance level resulting in the selection of 262 upregulated (positive effect size) and 667  
451 downregulated (negative effect size) genes.

452 **S3 Fig.** Heatmap of temporal expression patterns of structural constituents of the cuticle during  
453 development and under heat stress conditions.

454 **S1 Table.** Gene lists used for GO enrichment analysis, and detailed output of the enrichment  
455 analysis performed with the functional annotation tool provided by DAVID 6.8.

## 456 **References**

- 457 1. Tyedmers J, Mogk A, Bukau B. Cellular strategies for controlling protein aggregation. *Nat*  
458 *Rev Mol Cell Biol.* Nature Publishing Group; 2010;11: 777–788. doi:10.1038/nrm2993
- 459 2. Lindquist S. The Heat-Shock Response. *Ann Rev Biochem.* 1986;55: 1151–91.  
460 doi:10.1146/annurev.bi.55.070186.005443
- 461 3. David DC, Ollikainen N, Trinidad JC, Cary MP, Burlingame AL, Kenyon C. Widespread  
462 protein aggregation as an inherent part of aging in *C. elegans*. *PLoS Biol.* Public Library  
463 of Science; 2010;8: 47–48. doi:10.1371/journal.pbio.1000450
- 464 4. Rodriguez M, Basten Snoek L, De Bono M, Kammenga JE. Worms under stress: *C.*  
465 *elegans* stress response and its relevance to complex human disease and aging. *Trends*  
466 *Genet.* Elsevier Ltd; 2013;29: 367–374. doi:10.1016/j.tig.2013.01.010
- 467 5. Ben-Zvi A, Miller E a, Morimoto RI. Collapse of proteostasis represents an early  
468 molecular event in *Caenorhabditis elegans* aging. *Proc Natl Acad Sci U S A.* National  
469 Academy of Sciences; 2009;106: 14914–14919. doi:10.1073/pnas.0902882106
- 470 6. Kourtis N, Tavernarakis N. Cellular stress response pathways and ageing: intricate  
471 molecular relationships. *EMBO J.* Nature Publishing Group; 2011;30: 2520–31.  
472 doi:10.1038/emboj.2011.162
- 473 7. Zhou KI, Pincus Z, Slack FJ. Longevity and stress in *Caenorhabditis elegans*. *Aging*  
474 (Albany NY). 2011;3: 733–753. doi:100367 [pii]
- 475 8. Lithgow GJ, Walker GA. Stress resistance as a determinate of *C. elegans* lifespan. *Mech*  
476 *Ageing Dev.* 2002;123: 765–771. doi:10.1016/S0047-6374(01)00422-5
- 477 9. Morley JF, Morimoto RI. Regulation of longevity in *Caenorhabditis elegans* by heat shock  
478 factor and molecular chaperones. *Mol Biol Cell.* American Society for Cell Biology;

- 479 2004;15: 657–64. doi:10.1091/mbc.E03-07-0532
- 480 10. Zevian SC, Yanowitz JL. Methodological considerations for heat shock of the nematode  
481 *Caenorhabditis elegans*. *Methods*. 2014;68: 450–457. doi:10.1016/j.ymeth.2014.04.015
- 482 11. Rodriguez M, Snoek LB, Riksen JAG, Bevers RP, Kammenga JE. Genetic variation for  
483 stress-response hormesis in *C. elegans* lifespan. *Exp Gerontol*. Elsevier Inc.; 2012;47:  
484 581–587. doi:10.1016/j.exger.2012.05.005
- 485 12. Glauser DA, Chen WC, Agin R, Macinnis BL, Hellman AB, Garrity PA, et al. Heat  
486 avoidance is regulated by transient receptor potential (TRP) channels and a neuropeptide  
487 signaling pathway in *Caenorhabditis elegans*. *Genetics*. Genetics Society of America;  
488 2011;188: 91–103. doi:10.1534/genetics.111.127100
- 489 13. Cypser JR, Wu D, Park SK, Ishii T, Tedesco PM, Mendenhall AR, et al. Predicting  
490 longevity in *C. elegans*: Fertility, mobility and gene expression. *Mech Ageing Dev*.  
491 Elsevier Ireland Ltd; 2013;134: 291–297. doi:10.1016/j.mad.2013.02.003
- 492 14. McMullen PD, Aprison EZ, Winter PB, Amaral LAN, Morimoto RI, Ruvinsky I. Macro-  
493 level modeling of the response of *c. elegans* reproduction to chronic heat stress. *Sporns O*,  
494 editor. *PLoS Comput Biol*. Public Library of Science; 2012;8: e1002338.  
495 doi:10.1371/journal.pcbi.1002338
- 496 15. Aprison EZ, Ruvinsky I. Balanced trade-offs between alternative strategies shape the  
497 response of *C. elegans* reproduction to chronic heat stress. *PLoS One*. Public Library of  
498 Science; 2014;9: e105513. doi:10.1371/journal.pone.0105513
- 499 16. Stroustrup N, Ulmschneider BE, Nash ZM, López-Moyado IF, Apfeld J, Fontana W. The  
500 *Caenorhabditis elegans* Lifespan Machine. *Nat Methods*. 2013;10: 665–70.  
501 doi:10.1038/nmeth.2475

- 502 17. Snoek BL, Sterken MG, Bevers RPJ, Volkers RJM, Van't Hof A, Brenchley R, et al.  
503 Contribution of trans regulatory eQTL to cryptic genetic variation in *C. elegans*. *BMC*  
504 *Genomics*. BioMed Central; 2017;18: 500. doi:10.1186/s12864-017-3899-8
- 505 18. Brunquell J, Morris S, Lu Y, Cheng F, Westerheide SD. The genome-wide role of HSF-1  
506 in the regulation of gene expression in *Caenorhabditis elegans*. *BMC Genomics*. BioMed  
507 Central; 2016;17: 559. doi:10.1186/s12864-016-2837-5
- 508 19. de Nadal E, Ammerer G, Posas F. Controlling gene expression in response to stress. *Nat*  
509 *Rev Genet*. Nature Publishing Group; 2011;12: 833–45. doi:10.1038/nrg3055
- 510 20. Guhathakurta D, Palomar L, Stormo GD, Tedesco P, Johnson TE, Walker DW, et al.  
511 Identification of a novel cis-regulatory element involved in the heat shock response in  
512 *Caenorhabditis elegans* using microarray gene expression and computational methods.  
513 *Genome Res*. 2002;12: 701–712. doi:10.1101/gr.228902
- 514 21. Snoek LB, Sterken MG, Volkers RJM, Klatter M, Bosman KJ, Bevers RPJ, et al. A rapid  
515 and massive gene expression shift marking adolescent transition in *C. elegans*. *Sci Rep*.  
516 2014;4: 3912. doi:10.1038/srep03912
- 517 22. Guertin MJ, Petesch SJ, Zobeck KL, Min IM, Lis JT. *Drosophila* heat shock system as a  
518 general model to investigate transcriptional regulation. *Cold Spring Harb Symp Quant*  
519 *Biol*. 2010;75: 1–9. doi:10.1101/sqb.2010.75.039
- 520 23. Shivaswamy S, Bhinge A, Zhao Y, Jones S, Hirst M, Iyer VR. Dynamic remodeling of  
521 individual nucleosomes across a eukaryotic genome in response to transcriptional  
522 perturbation. Rando OJ, editor. *PLoS Biol*. Public Library of Science; 2008;6: 0618–0630.  
523 doi:10.1371/journal.pbio.0060065
- 524 24. Satyal SH, Chen D, Fox SG, Kramer JM, Morimoto RI. Negative regulation of the heat



- 525 shock transcriptional response by HSBP1. *Genes Dev.* Cold Spring Harbor Laboratory  
526 Press; 1998;12: 1962–1974. doi:10.1101/gad.12.13.1962
- 527 25. Abravaya K, Phillips B, Morimoto RI. Attenuation of the heat shock response in HeLa  
528 cells is mediated by the release of bound heat shock transcription factor and is modulated  
529 by changes in growth and in heat shock temperatures. *Genes Dev.* 1991;5: 2117–2127.  
530 doi:10.1101/gad.5.11.2117
- 531 26. Morimoto RI. Regulation of the heat shock transcriptional response: Cross talk between a  
532 family of heat shock factors, molecular chaperones, and negative regulators. *Genes Dev.*  
533 Cold Spring Harbor Laboratory Press; 1998;12: 3788–3796. doi:10.1101/gad.12.24.3788
- 534 27. Page A, Johnstone IL. The cuticle. *WormBook.* 2007; 1–15.  
535 doi:10.1895/wormbook.1.138.1
- 536 28. Johnstone IL, Barry JD. Temporal reiteration of a precise gene expression pattern during  
537 nematode development. *EMBO J.* European Molecular Biology Organization; 1996;15:  
538 3633–9.
- 539 29. Shin H, Lee H, Fejes AP, Baillie DL, Koo H-S, Jones SJ. Gene expression profiling of  
540 oxidative stress response of *C. elegans* aging defective AMPK mutants using massively  
541 parallel transcriptome sequencing. *BMC Res Notes.* 2011;4: 34. doi:10.1186/1756-0500-  
542 4-34
- 543 30. Brenner S. The genetics of *Caenorhabditis elegans*. *Genetics.* 1974;77: 71–94.  
544 doi:10.1002/cbic.200300625
- 545 31. Labbadia J, Morimoto RI. Repression of the Heat Shock Response Is a Programmed Event  
546 at the Onset of Reproduction. *Mol Cell.* Elsevier Inc.; 2015;59: 639–650.  
547 doi:10.1016/j.molcel.2015.06.027

- 548 32. Hosono R, Sato Y, Aizawa SI, Mitsui Y. Age-dependent changes in mobility and  
549 separation of the nematode *Caenorhabditis elegans*. *Exp Gerontol*. Pergamon Press Ltd;  
550 1980;15: 285–289. doi:10.1016/0531-5565(80)90032-7
- 551 33. Herndon LA, Schmeissner PJ, Dudaronek JM, Brown PA, Listner KM, Sakano Y, et al.  
552 Stochastic and genetic factors influence tissue-specific decline in ageing *C. elegans*.  
553 *Nature*. 2002;419: 808–814. doi:10.1038/nature01135
- 554 34. Zahurak M, Parmigiani G, Yu W, Scharpf RB, Berman D, Schaeffer E, et al. Pre-  
555 processing Agilent microarray data. *BMC Bioinformatics*. 2007;8: 142. doi:10.1186/1471-  
556 2105-8-142
- 557 35. Smyth GK, Speed T. Normalization of cDNA microarray data. *Methods*. 2003;31: 265–  
558 273. doi:10.1016/S1046-2023(03)00155-5
- 559 36. Huang DW, Lempicki R a, Sherman BT. Systematic and integrative analysis of large gene  
560 lists using DAVID bioinformatics resources. *Nat Protoc*. Nature Publishing Group;  
561 2009;4: 44–57. doi:10.1038/nprot.2008.211
- 562 37. Huang DW, Sherman BT, Lempicki RA. Bioinformatics enrichment tools: Paths toward  
563 the comprehensive functional analysis of large gene lists. *Nucleic Acids Res*. Oxford  
564 University Press; 2009;37: 1–13. doi:10.1093/nar/gkn923
- 565 38. Snoek LB, Van Der Velde KJ, Arends D, Li Y, Beyer A, Elvin M, et al. WormQTL-  
566 public archive and analysis web portal for natural variation data in *Caenorhabditis* spp.  
567 *Nucleic Acids Res*. 2013;41: 1–6. doi:10.1093/nar/gks1124
- 568 39. Van Der Velde KJ, De Haan M, Zych K, Arends D, Snoek LB, Kammenga JE, et al.  
569 WormQTLHD - A web database for linking human disease to natural variation data in *C.*  
570 *Elegans*. *Nucleic Acids Res*. Oxford University Press; 2014;42: 1–8.

571            doi:10.1093/nar/gkt1044

572

**A**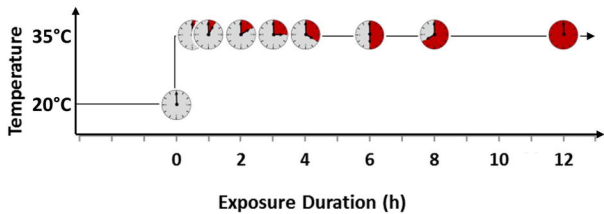**B**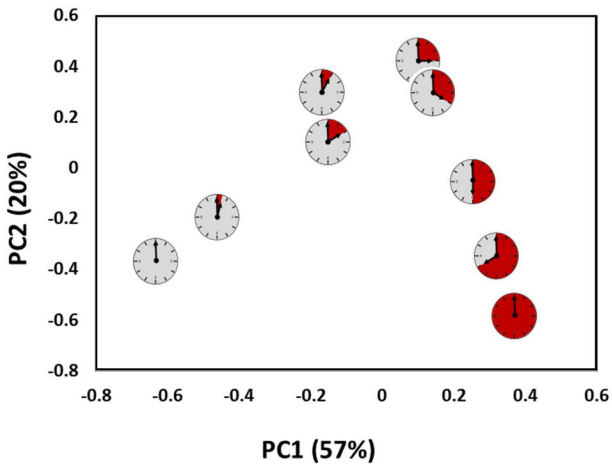

A

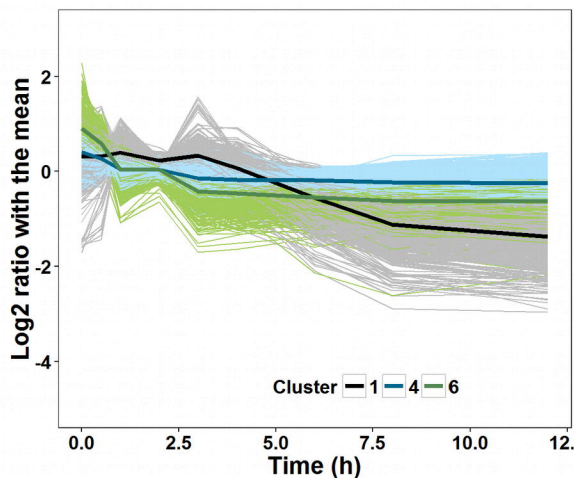

B

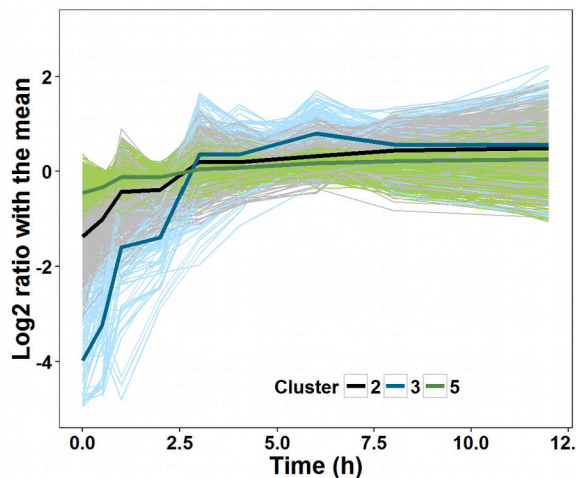

C

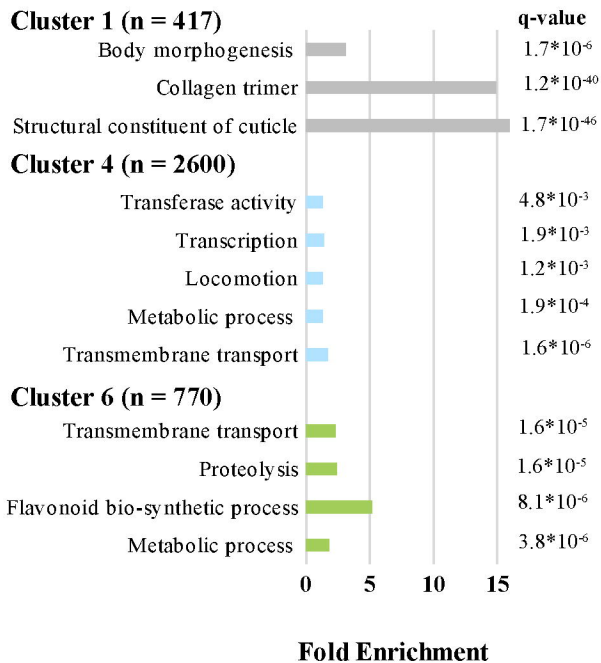

D

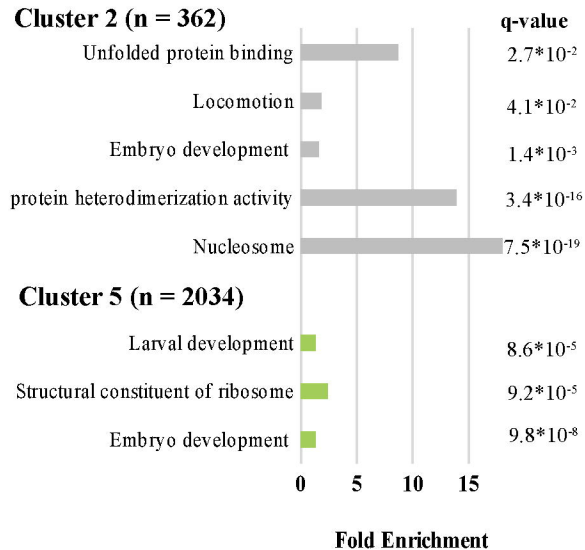

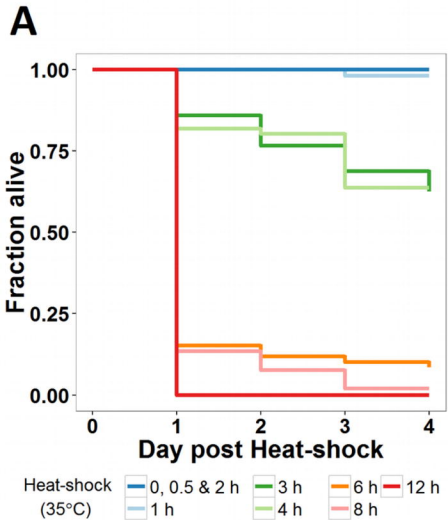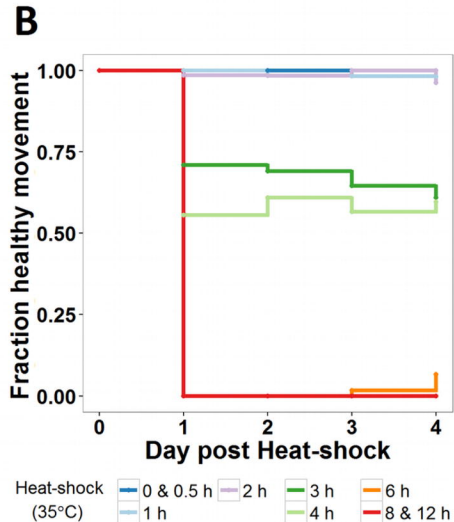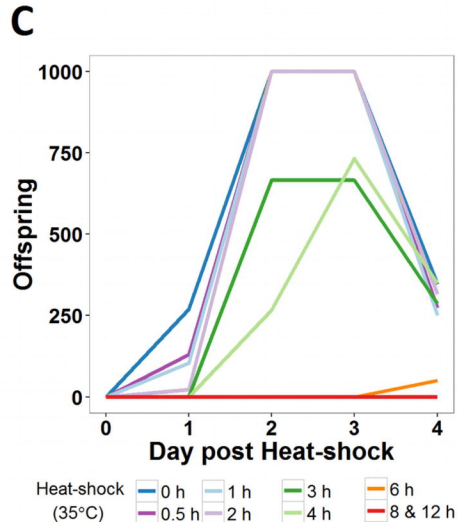

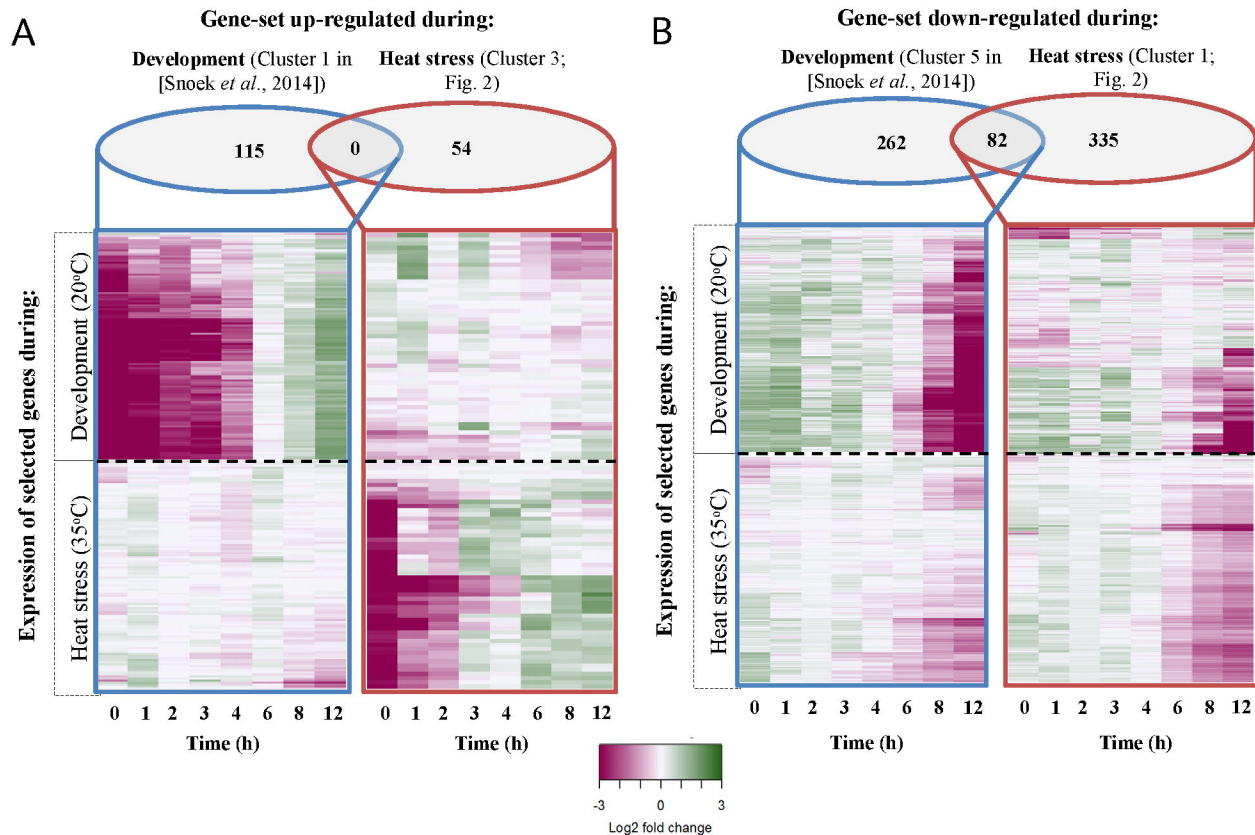

Source: http://biorxiv.org/content/10.1101/135988v2.full.pdf
